# Supplementary material
Source: PubMed Central journal article supplement (PMC2931796)

Fig. S1

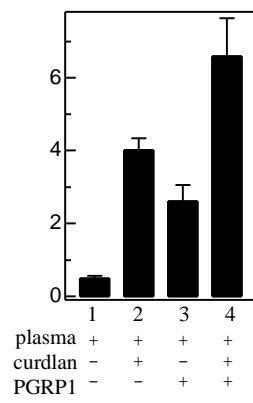

Supplement: NIHMS206494-supplement-01.pdf [file NIHMS206494-supplement-01.pdf]
